# Supplementary material
Source: Springer Nature journal article supplement (https://www.springermedizin.de/resource/supplementary/12990_2010_357_MOESM6_ESM.pdf/9613106)

Decrease of

Nociceptive Threshold [%]

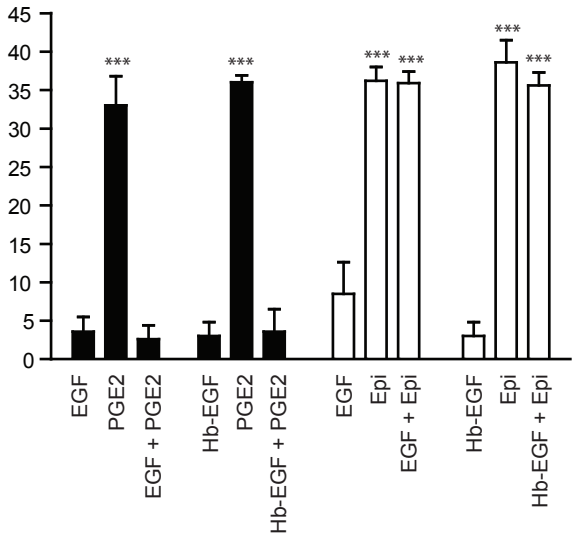

Supplement: MOESM6 [file 9613106]
